# Supplementary material for: The Use of Technology in the Clinical Care of Anxiety: An Evidence Map
Source: Atypon-hosted journal article supplement (doi:10.1176/appi.ps.202000178), 2020-12-09
Supplement: appi.ps.202000178.ds001.pdf [file appi.ps.202000178.ds001.pdf]

**Online Supplement**

Search methodology.....2  
Inclusion/exclusion eligibility criteria.....8  
List of abstracted variables.....10  
PRISMA literature flow diagram.....12  
Evidence Table.....13  
Supplement References.....33

**Search methodology**

**INITIAL SEARCH (for original study of the use of technology in the clinical care of both anxiety and depressive disorders):**

**DATABASE SEARCHED & TIME PERIOD COVERED:**

PubMed – From inception to 6/28/2017

**LANGUAGE:**

English

**SEARCH STRATEGY:**

"Telemedicine"[Mesh] OR telemedicine[tiab] OR telehealth[ti] OR email[tiab] OR internet[ti] OR video[tiab] OR videos[tiab] OR skype[tiab] OR computer-based OR phone-based OR telephone-based OR web-based[tiab] OR computerized OR smartphone OR avatar OR "information and communication technology" OR ict OR cell phone\* OR mobile phone\* OR "interactive voice response" OR text message\* OR "digital communication" OR "e-health" OR (virtual AND communicat\*) OR "interactive video" OR web-cam\* OR webcam\* OR remote monitor\* OR remotely monitor\* OR two-way camera\* OR personal monitor\* OR web-based portal\* OR social network\* OR "secure chat" OR chatroom\* OR chat room\* OR online[tiab] OR online[ot] OR information technolog\*

AND

"Anxiety Disorders"[Mesh] OR "Depressive Disorder"[Mesh] OR anxiety OR phobia\* OR panic OR depressive disorder\* OR depression[tiab] OR depression[ot] OR depressive[tiab] OR depressive[ot] OR dysthymi\*

AND

“Professional-Patient Relations”[mh] OR “Health Services Accessibility”[mh] OR physician-patient relation\* OR patient-physician relation\* OR doctor-patient relation\* OR patient-doctor relation\* OR access\*[tiab] OR access\*[ot]

AND

randomi\* OR "random allocation" OR rct\* OR Filters: Randomized Controlled Trial

=====  
**DATABASE SEARCHED & TIME PERIOD COVERED:**

PsycINFO – From inception to 6/28/2017

**LANGUAGE:**

English

**SEARCH STRATEGY:**

TI, SU, AB ( telemedicine OR telehealth OR email OR internet OR video OR videos OR skype OR computer-based OR phone-based OR telephone-based OR web-based OR computerized OR smartphone OR avatar OR "information and communication technology" OR ict OR "cell phone" OR "cell phones" OR cellphone\* OR "mobile phone" OR "mobile phones" OR "interactive voice response" OR "text message" OR "text messages" OR "text messaging" OR "digital communication" OR "e-health" OR (virtual AND communicat\*) ) OR DE "Information Technology" OR DE "Automated Information Processing" OR DE "Bioinformatics" OR TI, SU, AB ( "interactive video" OR web-cam\* OR webcam\* OR "remote monitoring" OR "remote monitor" OR "remote monitors" OR "remotely monitor" OR "remotely monitoring" OR "two-way camera" OR "two-way cameras" OR "personal monitor" OR

"personal monitors" OR "web-based portal" OR "web-based portals" OR "social network" OR "social networks" OR "social networking" OR chatroom\* OR "chat room" OR "chat rooms" OR online )  
AND

DE "Major Depression" OR DE "Anaclitic Depression" OR DE "Dysthymic Disorder" OR DE "Endogenous Depression" OR DE "Late Life Depression" OR DE "Reactive Depression" OR DE "Recurrent Depression" OR DE "Treatment Resistant Depression" OR DE "Anxiety" OR DE "Social Anxiety" OR DE "Anxiety Management" OR DE "Panic" OR DE "Phobias" OR DE "Anxiety Disorders" OR DE "Generalized Anxiety Disorder" OR DE "Obsessive Compulsive Disorder" OR DE "Panic Disorder" OR TI ( anxiety OR phobia\* OR panic OR depression OR depressive ) OR SU ( anxiety OR phobia\* OR panic OR depression OR depressive OR dysthym\* ) OR AB ( anxiety OR phobia\* OR panic OR depression OR depressive )

AND

TI ( "physician-patient relationship" OR "patient-physician relationship" OR "physician-patient relations" OR "patient-physician relations" OR "professional-patient relationship" OR "professional-patient relations" OR access\* ) OR SU ( "physician-patient relationship" OR "patient-physician relationship" OR "physician-patient relations" OR "patient-physician relations" OR "professional-patient relationship" OR "professional-patient relations" OR access\* ) OR AB ( "physician-patient relationship" OR "patient-physician relationship" OR "physician-patient relations" OR "patient-physician relations" OR "professional-patient relationship" OR "professional-patient relations" OR access\*

AND

TI ( randomi\* OR "random allocation" OR rct\* ) OR SU ( randomi\* OR "random allocation" OR rct\* ) OR AB ( randomi\* OR "random allocation" OR rct\* )

=====

**DATABASE SEARCHED & TIME PERIOD COVERED:**

Web of Science – From inception to 6/28/2017

**LANGUAGE:**

English

**SEARCH STRATEGY:**

ts=(telemedicine OR telehealth OR email OR internet OR video OR videos OR skype OR computer-based OR phone-based OR telephone-based OR web-based OR computerized OR smartphone OR avatar OR "information and communication technology" OR ict OR "cell phone" OR "cell phones" OR cellphone\* OR "mobile phone" OR "mobile phones" OR "interactive voice response" OR "text message" OR "text messages" OR "text messaging" OR "digital communication" OR "e-health" OR (virtual AND communicat\*) OR "Information Technology" OR "Automated Information Processing" OR "Bioinformatics" OR "interactive video" OR web-cam\* OR webcam\* OR "remote monitoring" OR "remote monitor" OR "remote monitors" OR "remotely monitor" OR "remotely monitoring" OR "two-way camera" OR "two-way cameras" OR "personal monitor" OR "personal monitors" OR "web-based portal" OR "web-based portals" OR "social network" OR "social networks" OR "social networking" OR chatroom\* OR "chat room" OR "chat rooms" OR online)

AND

ts=(anxiety OR phobia\* OR panic OR depression OR depressive OR dysthym\*)

AND

ts=("physician-patient relationship" OR "patient-physician relationship" OR "physician-patient relations" OR "patient-physician relations" OR "professional-patient relationship" OR "professional-patient relations" OR access\*)

AND

ts=(randomi\* OR "random allocation" OR rct\*)

---

---

**DATABASE SEARCHED & TIME PERIOD COVERED:**

Cochrane CENTRAL – From inception to 6/28/2017

**LANGUAGE:**

English

**SEARCH STRATEGY:**

telemedicine or telehealth or email or internet or video or videos or skype or computer-based or phone-based or telephone-based or web-based or computerized or smartphone or avatar or "information and communication technology" or ict or "cell phone" or "cell phones" or cellphone\* or "mobile phone" or "mobile phones" or "interactive voice response" or "text message" or "text messages" or "text messaging" or "digital communication" or "e-health" or (virtual and communicat\*) or "information technology" or "interactive video" or web-cam\* or webcam\* or "remote monitoring" or "remote monitor" or "remote monitors" or "remotely monitor" or "remotely monitoring" or "two-way camera" or "two-way cameras" or "personal monitor" or "personal monitors" or "web-based portal" or "web-based portals" or "social network" or "social networks" or "social networking" or chatroom\* or "chat room" or "chat rooms" or online:ti,ab,kw (Word variations have been searched) OR MeSH descriptor: [Telemedicine] explode all trees

AND

anxiety or phobia\* or panic or depression or depressive or dysthym\*:ti,ab,kw (Word variations have been searched) OR MeSH descriptor: [Depression] this term only OR MeSH descriptor: [Depressive Disorder] explode all trees OR MeSH descriptor: [Anxiety] this term only OR MeSH descriptor: [Panic] this term only

AND

"physician-patient relationship" or "patient-physician relationship" or "physician-patient relations" or "patient-physician relations" or "professional-patient relationship" or "professional-patient relations" or access\*:ti,ab,kw (Word variations have been searched) OR MeSH descriptor: [Professional-Patient Relations] explode all trees OR MeSH descriptor: [Health Services Accessibility] explode all trees

---

---

**UPDATE SEARCH (for the use of technology in the clinical care of anxiety disorders only):**

**DATABASE SEARCHED AND TIME PERIOD COVERED:**

PubMed, From inception to 2/14/2019

**LANGUAGE:**

English

**SEARCH STRATEGY:**

[replace with Telemedicine [Mesh] OR Telemedicine [tiab] OR tele-medicine [tiab] OR telehealth[ti] OR tele-health[ti] OR telecare[ti] OR teleprogram\*[tiab] OR telepsychiatry\*[ti] OR telebehavio\*[ti] OR telecoaching[ti] OR technology-enhanced therapy[tiab] OR e-health[ti] OR e-therapy[ti] OR e-mental health[ti] OR "remote treatment"[ti] OR "blended therapy"[tiab] OR internet[ti] OR web[ti] OR web-based[tiab] OR web-assist\*[tiab] OR web-deliver\*[tiab] OR online[ti] OR "information technology-based"[ti] OR "information and communication technology"[ti] OR information technolog\*[ti]

OR smartphone[ti] OR "smart phone"[ti] OR (("mobile phone" OR "mobile phones" OR "cell phone" OR "cell phones") AND (assist\* OR deliver\* OR based))[tiab] OR (mobile app\*[tiab] AND assist\*[tiab] OR deliver\*[tiab])  
OR "computer-based"[ti] OR computer-assisted[ti] OR computer-aided[ti] OR computer-delivered[ti] OR "skype"[ti] OR "interactive voice response"[ti] OR text message\*[ti] OR "digital communication"[tiab] OR (virtual AND communicat\*[ti] OR "secure chat"[tiab] OR chatroom\*[ti] OR chat room\*[ti] OR "email-based"[tiab] OR email-assisted[tiab] OR email-aided[tiab] OR email-delivered[ti] OR OR video-conference[ti] OR videoconference\*[ti] OR video-delivered[ti] OR "interactive video" OR web-cam\*[tiab] OR webcam\*[tiab] OR two-way camera\*[tiab]  
OR "cell phone-based"[ti] OR telephone-based[ti] OR telephone-delivered[ti] OR telephone-administered[ti] OR telephone-monitored[ti] OR telephone-facilitat\*[ti] OR telephone monitoring[ti] OR remote-monitor[tiab] OR remote monitor\*[ti] OR personal monitor\*[tiab]  
information technolog\*  
AND  
"Anxiety Disorders"[Mesh] OR OR anxiety OR phobia\* OR panic OR OR agoraphobia  
AND  
randomi\* OR "random allocation" OR rct\* OR Filters: Randomized Controlled Trial

---

**DATABASE SEARCHED AND TIME PERIOD COVERED:**

PsycINFO, From inception to 2/14/2019

**LANGUAGE:**

English

**SEARCH STRATEGY:**

TI, SU, AB ( telemedicine OR telehealth OR email OR internet OR video OR videos OR skype OR computer-based OR phone-based OR telephone-based OR web-based OR computerized OR smartphone OR avatar OR "information and communication technology" OR ict OR "cell phone" OR "cell phones" OR cellphone\* OR "mobile phone" OR "mobile phones" OR "interactive voice response" OR "text message" OR "text messages" OR "text messaging" OR "digital communication" OR "e-health" OR (virtual AND communicat\* ) OR DE "Information Technology" OR DE "Automated Information Processing" OR DE "Bioinformatics" OR TI, SU, AB ( "interactive video" OR web-cam\* OR webcam\* OR "remote monitoring" OR "remote monitor" OR "remote monitors" OR "remotely monitor" OR "remotely monitoring" OR "two-way camera" OR "two-way cameras" OR "personal monitor" OR "personal monitors" OR "web-based portal" OR "web-based portals" OR "social network" OR "social networks" OR "social networking" OR chatroom\* OR "chat room" OR "chat rooms" OR online )  
AND  
DE "Anxiety" OR DE "Social Anxiety" OR DE "Anxiety Management" OR DE "Panic" OR DE "Phobias" OR DE "Anxiety Disorders" OR DE "Generalized Anxiety Disorder" OR DE "Panic Disorder" OR TI ( anxiety OR phobia\* OR panic OR SU ( anxiety OR phobia\* OR panic OR OR AB ( anxiety OR phobia\* OR panic)  
AND  
TI ( randomi\* OR "random allocation" OR rct\* ) OR SU ( randomi\* OR "random allocation" OR rct\* ) OR AB ( randomi\* OR "random allocation" OR rct\* )

=====

**DATABASE SEARCHED AND TIME PERIOD COVERED:**

Web of Science, From 6/28/2017 to 2/14/2019

**LANGUAGE:**

English

**SEARCH STRATEGY:**

ts=(telemedicine OR telehealth OR email OR internet OR video OR videos OR skype OR computer-based OR phone-based OR telephone-based OR web-based OR computerized OR smartphone OR avatar OR "information and communication technology" OR ict OR "cell phone" OR "cell phones" OR cellphone\* OR "mobile phone" OR "mobile phones" OR "interactive voice response" OR "text message" OR "text messages" OR "text messaging" OR "digital communication" OR "e-health" OR (virtual AND communicat\*) OR "Information Technology" OR "Automated Information Processing" OR "Bioinformatics" OR "interactive video" OR web-cam\* OR webcam\* OR "remote monitoring" OR "remote monitor" OR "remote monitors" OR "remotely monitor" OR "remotely monitoring" OR "two-way camera" OR "two-way cameras" OR "personal monitor" OR "personal monitors" OR "web-based portal" OR "web-based portals" OR "social network" OR "social networks" OR "social networking" OR chatroom\* OR "chat room" OR "chat rooms" OR online)

AND

ts=(anxiety OR phobia\* OR panic OR)

AND

ts=(randomi\* OR "random allocation" OR rct\*)

=====

**DATABASE SEARCHED AND TIME PERIOD COVERED:**

Cochrane CENTRAL, From 6/28/2017 to 2/14/2019

**LANGUAGE:**

English

**SEARCH STRATEGY:**

telemedicine or telehealth or email or internet or video or videos or skype or computer-based or phone-based or telephone-based or web-based or computerized or smartphone or avatar or "information and communication technology" or ict or "cell phone" or "cell phones" or cellphone\* or "mobile phone" or "mobile phones" or "interactive voice response" or "text message" or "text messages" or "text messaging" or "digital communication" or "e-health" or (virtual and communicat\*) or "information technology" or "interactive video" or web-cam\* or webcam\* or "remote monitoring" or "remote monitor" or "remote monitors" or "remotely monitor" or "remotely monitoring" or "two-way camera" or "two-way cameras" or "personal monitor" or "personal monitors" or "web-based portal" or "web-based portals" or "social network" or "social networks" or "social networking" or chatroom\* or "chat room" or "chat rooms" or online:ti,ab,kw (Word variations have been searched) OR MeSH descriptor: [Telemedicine] explode all trees

AND

Anxiety[ti] or phobia\*[ti] or panic[ti]

AND

TI ( randomi\* OR "random allocation" OR rct\* ) OR SU ( randomi\* OR "random allocation" OR rct\* )  
OR AB ( randomi\* OR "random allocation" OR rct\* )

=====  
ClinicalTrials.gov, From inception to 2/20/2019

**SEARCH STRATEGY:**

**CONDITION/DISEASE:** anxiety OR panic OR phobi\* OR agoraphobia

**INTERVENTION/TREATMENT:** Telemedicine OR Telemedicine OR tele-medicine OR telehealth  
OR tele-health OR telecare OR teleprogram\* OR telepsychiatry\* OR telebehavio\* OR telecoaching OR  
technology-enhanced therapy OR e-health OR e-therapy OR e-mental health OR “remote treatment” OR  
“blended therapy” OR internet OR web OR web-based OR web-assist\* OR web-deliver\* OR online OR  
“information technology-based” OR “information and communication technology” OR information  
technolog\* OR smartphone OR “smart phone” OR (“mobile phone” OR “mobile phones” OR “cell  
phone” OR “cell phones”) AND (assist\* OR deliver\* OR based)) OR (mobile app\* AND assist\* OR  
deliver\*) OR “computer-based” OR computer-assisted OR computer-aided OR computer-delivered OR  
“skype” OR "interactive voice response" OR text message\* OR "digital communication" OR (virtual  
AND communicat\*) OR "secure chat" OR chatroom\* OR chat room\* OR “email-based” OR email-  
assisted OR email-aided OR email-delivered OR video-conference OR videoconference\* OR video-  
delivered OR "interactive video" OR web-cam\* OR webcam\* OR two-way camera\* OR “cell phone-  
based” OR telephone-based OR telephone-delivered OR telephone-administered OR telephone-monitored  
OR telephone-facilitat\* OR telephone monitoring OR remote-monitor OR remote monitor\* OR personal  
monitor\*

**FILTERED BY “INTERVENTIONAL STUDIES”:**

Check under ‘status:recruitment’ – completed

## **Inclusion/exclusion eligibility criteria**

Study inclusion and exclusion criteria are summarized in the following “PICOTSS” framework (participants, interventions, comparators, outcomes, timing, settings, and study design):

- **Participants:**

Studies of male and female participants, 18 years of age or older, were eligible for inclusion.

Participants could have any type of anxiety symptoms, diagnosis, or disorders, including generalized anxiety disorder, panic disorder, phobia, or other specified or unspecified anxiety disorders. Participants with anxiety due to a substance/ medication or medical condition were excluded.

Participants with other diagnoses such as obsessive-compulsive disorder or posttraumatic stress disorder were not classified as anxiety disorders according to the Diagnostic and Statistical Manual of Mental Disorders (DSM-5) and were excluded. Studies exclusively reporting on participants with self-limited, situational anxiety were excluded. Studies that did not include a majority of patients with anxiety disorders were excluded. Studies that involved a population of patients with a particular medical diagnosis or situation (such as caregivers), in which the intervention addressed primarily the medical or situational needs and secondarily anxiety symptoms, were excluded.

- **Interventions:**

Studies evaluating technology to directly treat anxiety, or in the clinical care in anxiety disorders were eligible. Interventions focused on collaborative care, such as between a primary care provider and a psychiatrist, were excluded. Interventions designed to treat or manage another condition, where the effects of the intervention on anxiety were secondary, were excluded. We included phone, smartphone, video, or computer-based technology for clinical care but technological treatment such as biofeedback, transcranial magnetic stimulation, or electroconvulsive therapy offered in a healthcare setting was excluded. The interventions could



be delivered in addition to non-pharmacologic or medication-based care.

- Comparators:

Studies that compare to anxiety disorder treatment, with or without the use of technology, wait-list control, or no-treatment were eligible.

- Outcomes:

Studies reporting symptom improvement, response to treatment, and remission of anxiety were eligible.

- Timing:

Studies could involve any treatment duration and any follow-up period.

- Setting:

Studies were not limited by setting.

- Study Design:

Studies that did not randomize to intervention vs comparator were excluded. Studies using any form of randomization (e.g., parallel and cross-over) were acceptable and included.

- Only studies published in English were eligible for inclusion in this evidence map.

## List of abstracted variables

We abstracted the following data:

- Study size: Number of randomized participants (if this was not available, the number of participants analyzed); number of participants in the technology intervention group
- Type of technology: Categories of the type of technology used in supporting clinical care, according to the type of technology most likely chosen by the participant, based on the lowest level of technology most likely to fully implement the intervention: phone only, computer only (online treatment, email communication with providers), smartphone only (app or texting), videoconferencing (interaction with provider, needs camera), multiple technology (explicitly using more than one technology, not for studies where patients have the choice between using a normal phone or a smart phone), other (technology could not be classified into the preceding categories).
- Function of technology: Categories of the function of the technology in clinical care: automated reminders (fully automated), provider-sent reminders (requires interaction with provider, provider-initiated), patients' self-directed support (online resources for patients, peer support), provider support (e.g., provider-run support group), self-directed psychotherapy (e.g., online modules), provider-directed psychotherapy (virtual interaction with provider, e.g., interaction by phone or online), automated feedback (e.g., after task completion; patient has instructions to record task and to watch it back with specific instruction), provider feedback (e.g., provider watches recorded video from patient and gives feedback), multiple functions, (function could not be classified into the preceding categories).
- Effectiveness signal: Category of directionality of effectiveness measure (i.e., are the symptoms of anxiety improved relative to no technology?): negative (i.e. intervention group outcomes are worse than the control group or baseline outcomes); unclear (effect unclear, no change, or not

applicable because two active technologies were compared); positive (i.e., intervention group outcomes are better than control group or baseline outcomes). The category is based on results as reported by the original study authors and will be based on the outcomes most relevant to the diagnosis in the respective study (e.g., anxiety symptoms in patients treated for anxiety), compared to no use of technology.

## PRISMA literature flow diagram

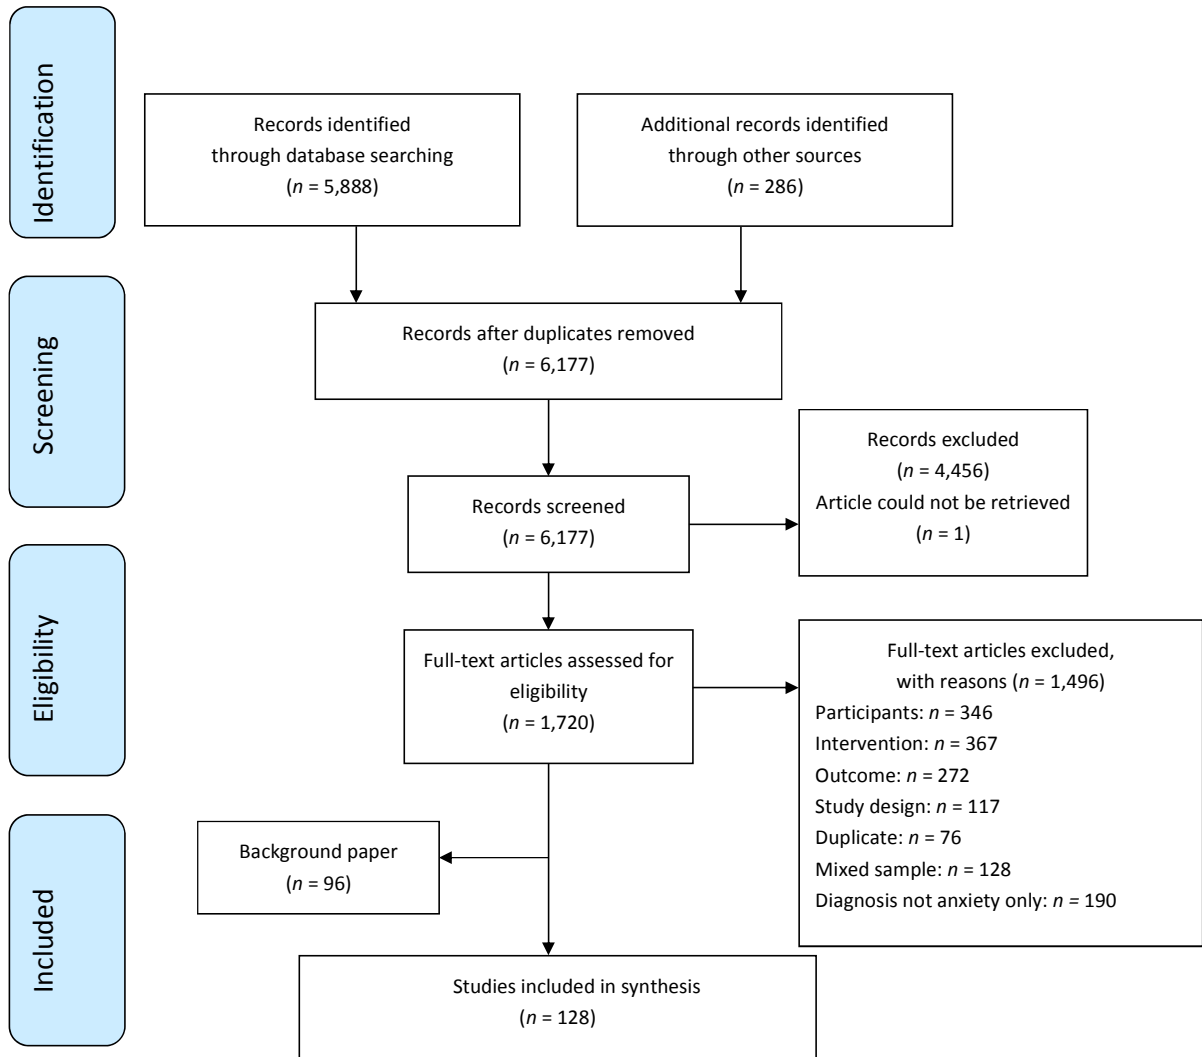

## Evidence Table

| Study                           | N   | Comparator                                                                                                                                     | Technology                       |                                                                                              | Effectiveness Signal |
|---------------------------------|-----|------------------------------------------------------------------------------------------------------------------------------------------------|----------------------------------|----------------------------------------------------------------------------------------------|----------------------|
|                                 |     |                                                                                                                                                | Type                             | Function                                                                                     |                      |
| Allen, 2016(1)                  | 67  | Waitlist                                                                                                                                       | Computer                         | Multiple: Self-directed psychotherapy with email therapist support                           | Positive             |
| Amir, 2006(2)                   | 48  | Control: Attention Disengagement Training                                                                                                      | Computer                         | Self-therapy                                                                                 | Unclear              |
| Amir, 2019(3)<br>NCT00602563(4) | 169 | TAU; Alternative: Applied relaxation + psychoeducation followed by ABM; Alternative: Applied relaxation + psychoeducation + ABM (simultaneous) | Computer                         | Multiple: ABM followed by applied relaxation + psychoeducation                               | Positive             |
| Andersson, 2006(5)              | 64  | Waitlist                                                                                                                                       | Computer                         | Multiple: Self-directed psychotherapy with discussion forum and email contact with therapist | Positive             |
| Andersson, 2009(6)              | 30  | Other: One-session in-person exposure                                                                                                          | Multiple: Computer and videotape | Exposure                                                                                     | Positive             |
|                                 |     |                                                                                                                                                |                                  |                                                                                              |                      |

| Study                                                   | N   | Comparator                                                   | Technology                   |                                                                                                         | Effectiveness Signal |
|---------------------------------------------------------|-----|--------------------------------------------------------------|------------------------------|---------------------------------------------------------------------------------------------------------|----------------------|
|                                                         |     |                                                              | Type                         | Function                                                                                                |                      |
| Andersson, 2012(7)                                      | 81  | Waitlist;<br>Alternative:<br>Internet-based CBT              | Computer                     | Provider-directed psychotherapy                                                                         | Positive             |
| Andersson, 2012(8)                                      | 204 | Alternative: Online discussion forum                         | Computer                     | Self-therapy                                                                                            | Positive             |
| Andersson, 2013(9)                                      | 26  | Other: One-time in-person exposure treatment with therapists | Multiple: Computer and video | Exposure                                                                                                | Positive             |
| Andrews, 2011(10)                                       | 37  | Other: Face-to-face CBT                                      | Computer                     | Multiple: Self-directed psychotherapy, forum moderated by clinician, automatic emails and text messages | Positive             |
| Ashford, 2018(11)<br>Ashford2017(12)<br>NCT02434406(13) | 89  | Waitlist                                                     | Computer                     | Self-therapy                                                                                            | Positive             |
| Bautista, 2018(14)                                      | 35  | Waitlist                                                     | Computer                     | Self-therapy                                                                                            | Positive             |
| Beard, 2008(15)                                         | 27  | Alternative: Interpretation control condition                | Computer                     | Exposure                                                                                                | Positive             |
| Beard, 2011(16)                                         | 32  | Control: Placebo ABM                                         | Computer                     | Self-therapy                                                                                            | Positive             |
|                                                         |     |                                                              |                              |                                                                                                         |                      |

| Study               | N   | Comparator                                                                  | Technology |                                                                                                        | Effectiveness Signal                                    |
|---------------------|-----|-----------------------------------------------------------------------------|------------|--------------------------------------------------------------------------------------------------------|---------------------------------------------------------|
|                     |     |                                                                             | Type       | Function                                                                                               |                                                         |
| Berger, 2009(17)    | 52  | Waitlist                                                                    | Computer   | Multiple: Self-directed psychotherapy with text based therapist support; online group                  | Positive (within groups effects not reported / unclear) |
| Berger, 2010(18)    | 132 | Waitlist;<br>Alternative:<br>Standardized disorder-specific treatment       | Computer   | Multiple: Self-directed psychotherapy; online discussion forum; scheduled email contact with therapist | Positive                                                |
| Berger, 2011(19)    | 81  | Alternative: Guided self-help;<br>Alternative: Step up of support on demand | Computer   | Self-therapy                                                                                           | Positive                                                |
| Berger, 2016(20)    | 139 | TAU                                                                         | Computer   | Self-therapy                                                                                           | Positive                                                |
| Berghoff, 2018(21)  | 120 | Control: Movie genre preferences (control task)                             | Computer   | Other: Self-directed education                                                                         | No change                                               |
| Bergstrom, 2010(22) | 113 | Other: Psychologist-led group therapy                                       | Computer   | Multiple: Self-directed psychotherapy with email therapist support                                     | Positive                                                |

| Study               | N   | Comparator                                                                                                                                                                                                                     | Technology                        |              | Effectiveness Signal |
|---------------------|-----|--------------------------------------------------------------------------------------------------------------------------------------------------------------------------------------------------------------------------------|-----------------------------------|--------------|----------------------|
|                     |     |                                                                                                                                                                                                                                | Type                              | Function     |                      |
| Bickel, 2008(23)    | 22  | Waitlist                                                                                                                                                                                                                       | Computer                          | Self-therapy | Positive             |
| Boettcher, 2012(24) | 68  | Control: Control dot-probe task                                                                                                                                                                                                | Computer                          | Self-therapy | Positive             |
| Boettcher, 2013(25) | 129 | Control: Control condition words;<br>Control: Control condition words + faces;<br>Alternative: 'Attend to threat' words + face;<br>Alternative: 'Attend to positive' words;<br>Alternative: 'Attend to positive' words + faces | Computer                          | Self-therapy | Positive             |
| Boettcher, 2014(26) | 133 | Control: Sham applied attention training + iCBT                                                                                                                                                                                | Computer                          | Self-therapy | Positive             |
| Boettcher, 2014(27) | 91  | Alternative: Online discussion forum                                                                                                                                                                                           | Computer                          | Self-therapy | Positive             |
| Boettcher, 2018(28) | 209 | Waitlist                                                                                                                                                                                                                       | Multiple: Computer and smartphone | Self-therapy | Positive             |
| Bornas, 2006(29)    | 41  | Other: Multi-component nonexposure                                                                                                                                                                                             | Computer                          | Exposure     | Positive             |
|                     |     |                                                                                                                                                                                                                                |                                   |              |                      |



| Study                                | N   | Comparator                                                                                  | Technology      |                                                                                 | Effectiveness Signal |
|--------------------------------------|-----|---------------------------------------------------------------------------------------------|-----------------|---------------------------------------------------------------------------------|----------------------|
|                                      |     |                                                                                             | Type            | Function                                                                        |                      |
| Botella, 2010(30)                    | 127 | Waitlist; Other: face-to-face treatment                                                     | Computer        | Self-therapy                                                                    | Positive             |
| Bouchard, 2004(31)                   | 21  | Waitlist                                                                                    | Videoconference | Provider-directed psychotherapy                                                 | Positive             |
| Brenes, 2012(32)                     | 60  | Other: Education/information                                                                | Phone           | Provider-directed psychotherapy                                                 | Positive             |
| Brenes, 2015(33)<br>Brenes, 2017(34) | 141 | Alternative: Non-directive supportive therapy                                               | Phone           | Provider-directed psychotherapy                                                 | Positive             |
| Butler, 2015(35)                     | 40  | Alternative: Neutral cognitive bias modification for interpretative biases (active control) | Computer        | Self-therapy                                                                    | Positive             |
| Campos, 2018(36)                     | 46  | Alternative: Provider-directed therapy                                                      | Computer        | Self-therapy                                                                    | Unclear              |
| Carlbring, 2003(37)                  | 22  | Alternative: Applied relaxation                                                             | Computer        | Multiple: Self-directed psychotherapy but email feedback to progress in therapy | Positive             |

| Study               | N  | Comparator                        | Technology                   |                                                                                                               | Effectiveness Signal |
|---------------------|----|-----------------------------------|------------------------------|---------------------------------------------------------------------------------------------------------------|----------------------|
|                     |    |                                   | Type                         | Function                                                                                                      |                      |
| Carlbring, 2005(38) | 49 | Other: In-person psychotherapy    | Computer                     | Multiple: Self-directed psychotherapy with therapist feedback and support                                     | Positive             |
| Carlbring, 2006(39) | 60 | Waitlist                          | Multiple Phone and computer  | Multiple: Self-directed psychotherapy with email therapist support, weekly calls, and online discussion group | Positive             |
| Carlbring, 2007(40) | 60 | Waitlist                          | Multiple: Phone and computer | Multiple: Self-directed psychotherapy with weekly therapist phone calls                                       | Positive             |
| Carlbring, 2008(41) | 41 | Waitlist                          | Computer                     | Self-therapy                                                                                                  | Positive             |
| Carlbring, 2011(42) | 54 | Alternative: Online support group | Computer                     | Multiple: Self-directed psychotherapy with email therapist support                                            | Positive             |
|                     |    |                                   |                              |                                                                                                               |                      |

| Study               | N   | Comparator                                                                                                                                | Technology                        |                                                                             | Effectiveness Signal |
|---------------------|-----|-------------------------------------------------------------------------------------------------------------------------------------------|-----------------------------------|-----------------------------------------------------------------------------|----------------------|
|                     |     |                                                                                                                                           | Type                              | Function                                                                    |                      |
| Carlbring, 2012(43) | 79  | Control: Placebo ABM                                                                                                                      | Multiple: Smartphone and Computer | Multiple: Self-directed psychotherapy with email and text message reminders | No change            |
| Carleton, 2016(44)  | 113 | Control: Online Attention Control Condition                                                                                               | Computer                          | Multiple: Self-directed psychotherapy with email/call reminders             | Positive             |
| Chen, 2015(45)      | 41  | Control: Control video feedback without cognitive; Alternative: Audience feedback + video; Other: Audience feedback; feedback preparation | VCR                               | Auto-feedback                                                               | Unclear              |
| Chen, 2018(46)      | 151 | Alternative: Video feedback + cognitive review; Alternative: Video feedback + cognitive review + audience feedback                        | VCR                               | Auto-feedback                                                               | Positive             |
|                     |     |                                                                                                                                           |                                   |                                                                             |                      |

| Study                  | N   | Comparator                                                                                                                                                                   | Technology                        |                                                                           | Effectiveness Signal |
|------------------------|-----|------------------------------------------------------------------------------------------------------------------------------------------------------------------------------|-----------------------------------|---------------------------------------------------------------------------|----------------------|
|                        |     |                                                                                                                                                                              | Type                              | Function                                                                  |                      |
| Choi 2005,(47)         | 40  | Other: Panic Control Program:<br>Psychoeducation + Breathing retraining and muscle relaxation training + Cognitive restructuring + Interoceptive exposure + In vivo exposure | VR NR                             | Exposure                                                                  | Positive             |
| Christoforou, 2017(48) | 170 | Alternative: Stress Free generic CBT app                                                                                                                                     | Smartphone                        | Self-therapy                                                              | Positive             |
| Ciuca, 2018(49)        | 111 | Waitlist                                                                                                                                                                     | Computer                          | Multiple: Provider-directed psychotherapy and self-directed psychotherapy | Positive             |
| Dagoo, 2014(50)        | 52  | Alternative: mobile CBT                                                                                                                                                      | Multiple: Smartphone and computer | Multiple: Self-directed psychotherapy with therapist support              | Positive             |
| Dahlin, 2016(51)       | 103 | Waitlist                                                                                                                                                                     | Computer                          | Multiple: Self-guided psychotherapy with online therapist support         | Positive             |
|                        |     |                                                                                                                                                                              |                                   |                                                                           |                      |

|                   |     |                                                                                                                                                                                                                                                 | Technology                                     |                                                                     |                      |
|-------------------|-----|-------------------------------------------------------------------------------------------------------------------------------------------------------------------------------------------------------------------------------------------------|------------------------------------------------|---------------------------------------------------------------------|----------------------|
| Study             | N   | Comparator                                                                                                                                                                                                                                      | Type                                           | Function                                                            | Effectiveness Signal |
| Dear, 2015(52)    | 72  | Waitlist                                                                                                                                                                                                                                        | Computer                                       | Multiple: Self-directed psychotherapy with online therapist support | Positive             |
| Edwards, 2018(53) | 379 | Alternative: Mixed positive/negative CBM + neutral imagery prime;<br>Alternative: Mixed positive/negative CBM + anxious imagery prime;<br>Alternative: Neutral CBM + neutral imagery prime;<br>Alternative: Neutral CBM + anxious imagery prime | Computer                                       | Self-therapy                                                        | Unclear              |
| Enock, 2014(54)   | 429 | Alternative: Control program on smartphone                                                                                                                                                                                                      | Smartphone                                     | Self-therapy                                                        | Positive             |
| Freeman, 2018(55) | 100 | TAU                                                                                                                                                                                                                                             | Multiple: Computer and VR head mounted display | Exposure                                                            | Positive             |
|                   |     |                                                                                                                                                                                                                                                 |                                                |                                                                     |                      |

| Study                 | N   | Comparator                                                                                                          | Technology                                                   |                                                                                                 | Effectiveness Signal |
|-----------------------|-----|---------------------------------------------------------------------------------------------------------------------|--------------------------------------------------------------|-------------------------------------------------------------------------------------------------|----------------------|
|                       |     |                                                                                                                     | Type                                                         | Function                                                                                        |                      |
| Furmark, 2009(56)     | 120 | Waitlist; Other: Bibliotherapy                                                                                      | Computer                                                     | Multiple: Self-directed psychotherapy with available online therapist                           | Positive             |
| Gallego, 2011(57)     | 41  | Waitlist                                                                                                            | Computer                                                     | Multiple: Self-directed psychotherapy with therapist reminder after 7 days of not participating | Positive             |
| Gershkovich, 2017(58) | 42  | Alternative: Self-therapy + provider support                                                                        | Multiple: Computer; Computer + videoconference/text messages | Self-therapy                                                                                    | Positive             |
| Gorini, 2010(59)      | 21  | Waitlist; Alternative: VR without biofeedback                                                                       | Smartphone                                                   | Multiple VR(exposure and relaxation) with biofeedback                                           | Positive             |
| Gotestam, 2002(60)    | 38  | Other: Direct exposure (live spider); Other: Model exposure (group observed other patients being exposed to spider) | VCR                                                          | Exposure                                                                                        | Positive             |
| Gross, 2018(61)       | 100 | Other: Unclear                                                                                                      | Smartphone                                                   | Provider support                                                                                | No change            |
|                       |     |                                                                                                                     |                                                              |                                                                                                 |                      |

| Study                                                   | N   | Comparator                                                                    | Technology                       |                                                                                 | Effectiveness Signal |
|---------------------------------------------------------|-----|-------------------------------------------------------------------------------|----------------------------------|---------------------------------------------------------------------------------|----------------------|
|                                                         |     |                                                                               | Type                             | Function                                                                        |                      |
| Haddadi, 2018(62)                                       | 30  | Alternative: Neutral ABM                                                      | Computer                         | Self-therapy                                                                    | Unclear              |
| Hazen, 2009(63)                                         | 24  | Control: Sham attentional retraining for threat stimuli                       | Computer                         | Self-therapy                                                                    | Positive             |
| Hedman, 2011(64)                                        | 81  | Alternative: Online discussion forum                                          | Computer                         | Multiple: Self-directed psychotherapy with online therapist support             | Positive             |
| Hedman, 2014(65)<br>Hedman, 2011(66)                    | 126 | Other: Group-based CBT                                                        | Computer                         | Provider-directed psychotherapy                                                 | Positive             |
| Hedman, 2014(67)<br>Hedman, 2016(68)<br>Hedman 2017(69) | 158 | Alternative: Internet behavioral stress management                            | Computer                         | Provider-directed psychotherapy                                                 | Positive             |
| Hedman, 2016(70)<br>Axelsson, 2016(71)                  | 132 | Waitlist; Other: Bibliotherapy; Alternative: Unguided iCBT                    | Computer                         | Provider-directed psychotherapy                                                 | Positive             |
| Ivanova, 2016(72)                                       | 152 | Waitlist; Alternative: Smartphone supplemented iCBT without therapist support | Multiple computer and smartphone | Multiple: Self-directed psychotherapy with smartphone app and therapist support | Unclear              |
| Johansson, 2017(73)<br>NCT02105259(74)                  | 72  | Waitlist                                                                      | Computer                         | Self-therapy                                                                    | Positive             |
|                                                         |     |                                                                               |                                  |                                                                                 |                      |

| Study                | N   | Comparator                                                        | Technology |                                                            | Effectiveness Signal |
|----------------------|-----|-------------------------------------------------------------------|------------|------------------------------------------------------------|----------------------|
|                      |     |                                                                   | Type       | Function                                                   |                      |
| Jones, 2016(75)      | 46  | Waitlist                                                          | Computer   | Multiple: Self-guided psychotherapy with therapist support | Positive             |
| Kahlke, 2019(76)     | 200 | Waitlist                                                          | Computer   | Multiple: Self-directed psychotherapy + auto-reminders     | Unclear              |
| Kanai, 2011(77)      | 25  | Control: Watched video of another's speech (active control)       | VCR        | Other: Peer feedback                                       | Positive             |
| Kenardy, 2003(78)    | 163 | Waitlist; Other: 6 or 12 sessions of provider-directed CBT        | Computer   | Self-therapy                                               | Positive             |
| Kiropoulos, 2008(79) | 86  | Other: Face-to-face psychotherapy                                 | Computer   | Multiple                                                   | Positive             |
| Klein, 2001(80)      | 22  | Other: Self-monitoring                                            | Computer   | Self-support                                               | Positive             |
| Klein, 2006(81)      | 55  | Alternative: Workbook plus phone support; Other: Information only | Computer   | Provider-directed psychotherapy                            | Positive             |



| Study                   | N   | Comparator                                                                | Technology                             |                                                                    | Effectiveness Signal                                |
|-------------------------|-----|---------------------------------------------------------------------------|----------------------------------------|--------------------------------------------------------------------|-----------------------------------------------------|
|                         |     |                                                                           | Type                                   | Function                                                           |                                                     |
| Klein, 2009(82)         | 57  | Alternative: Same but with less therapist contact                         | Computer                               | Multiple                                                           | Positive                                            |
| Kok, 2014(83)           | 212 | Waitlist                                                                  | Computer                               | Multiple                                                           | Positive                                            |
| LaFreniere, 2016(84)    | 52  | Control: Thought log                                                      | Smartphone                             | Auto-reminders                                                     | Positive                                            |
| Lee, 2015(85)           | 50  | Control: Control program on computer                                      | Computer                               | Self-therapy                                                       | Positive                                            |
| Lorian, 2012(86)        | 48  | Waitlist                                                                  | Computer                               | Self-therapy                                                       | Positive                                            |
| Mall, 2011(87)          | 24  | Waitlist                                                                  | Multiple computer, DVD player, printer | Multiple: Self-directed psychotherapy with email therapist support | Positive                                            |
| Maples-Keller, 2017(88) | 89  | Alternative: Neutral cue VRE                                              | VR VRE glasses                         | Exposure                                                           | Positive                                            |
| Marks, 2004(89)         | 93  | Alternative: Self-guided relaxation by computer, and face-to-face therapy | Computer                               | Exposure                                                           | Positive                                            |
| Mathiasen, 2016(90)     | 67  | Waitlist                                                                  | Computer                               | Multiple: Self-directed psychotherapy with therapist assistance    | No change (within group effectiveness not reported) |
|                         |     |                                                                           |                                        |                                                                    |                                                     |

| Study              | N   | Comparator                                                                         | Technology                 |                                 | Effectiveness Signal |
|--------------------|-----|------------------------------------------------------------------------------------|----------------------------|---------------------------------|----------------------|
|                    |     |                                                                                    | Type                       | Function                        |                      |
| Matthews, 2015(91) | 37  | Waitlist;<br>Alternative: Real spider images                                       | Computer                   | Exposure                        | Positive             |
| McCall, 2018(92)   | 101 | Waitlist                                                                           | Computer                   | Self-therapy                    | Positive             |
| Meuret, 2017(93)   | 60  | Alternative                                                                        | VCR                        | Exposure                        | Unclear              |
| Minns, 2019(94)    | 77  | Waitlist: Waitlist + psychoeducational control                                     | VR computer and VR headset | Exposure                        | Positive             |
| Muller, 2011(95)   | 36  | Alternative: Computer showing neutral pictures                                     | Computer                   | Exposure                        | Positive             |
| Neubauer, 2013(96) | 59  | Alternative: Computerized program, not therapeutic                                 | Computer                   | Self-therapy                    | Positive             |
| Nilsson, 2016(97)  | 41  | Alternative: Listened to self on audiotape but not instructed to reduce self focus | Other: audiotape           | Exposure                        | Positive             |
| Nordgren, 2014(98) | 100 | Control: Check-in with online therapist, no therapy (attention control)            | Computer                   | Provider-directed psychotherapy | Positive             |
|                    |     |                                                                                    |                            |                                 |                      |

| Study                                    | N  | Comparator                                                                                               | Technology                       |                   | Effectiveness Signal |
|------------------------------------------|----|----------------------------------------------------------------------------------------------------------|----------------------------------|-------------------|----------------------|
|                                          |    |                                                                                                          | Type                             | Function          |                      |
| Nowakowski, 2015(99)                     | 72 | Control: Positive and negative computer scenarios;<br>Alternative: Cognitive restructuring computer task | Computer                         | Self-therapy      | No change            |
| Orbach, 2007(100)                        | 90 | Alternative: Non-psychotherapeutic information via computer                                              | Computer                         | Self-therapy      | Positive             |
| Oromendia, 2016(101)<br>NCT02105259(102) | 77 | Waitlist;<br>Alternative: Online self-therapy + scheduled provider support                               | Computer                         | Self-therapy      | Positive             |
| Orr, 2010(103)<br>Orr, 2014(104)         | 68 | Alternative: Video feedback without cognitive review;<br>Other: Speech exposure without video,           | VCR                              | Provider feedback | Positive             |
| Pallavicini, 2009(105)                   | 13 | Waitlist;<br>Alternative: Biofeedback + self-therapy via virtual reality and smartphone                  | Multiple computer and smartphone | Self-therapy      | Positive             |
|                                          |    |                                                                                                          |                                  |                   |                      |

| Study                                    | N   | Comparator                                                  | Technology |                                                                          | Effectiveness Signal |
|------------------------------------------|-----|-------------------------------------------------------------|------------|--------------------------------------------------------------------------|----------------------|
|                                          |     |                                                             | Type       | Function                                                                 |                      |
| Paxling, 2011(106)                       | 89  | Waitlist                                                    | Computer   | Provider-directed psychotherapy                                          | Positive             |
| Pham, 2016(107)                          | 63  | Waitlist                                                    | Smartphone | Other: Self-directed breathing retraining games                          | Positive             |
| Richards, 2016(108)                      | 137 | Waitlist                                                    | Computer   | Multiple: Self-directed psychotherapy with psychologist feedback         | Positive             |
| Robillard, 2010(109)                     | 45  | Waitlist; Other: In-person CBT                              | VR         | Exposure                                                                 | Positive             |
| Robinson, 2010(110)                      | 150 | Waitlist; Alternative: Online CBT with clinician assistance | Computer   | Multiple: Self-directed psychotherapy with weekly emails with technician | Positive             |
| Rollman, 2017(111)<br>Rollman, 2016(112) | 250 | TAU                                                         | Phone      | Provider support                                                         | Positive             |
| Rosmarin, 2010(113)                      | 261 | Waitlist; Alternative: Progressive muscle relaxation        | Computer   | Self-therapy                                                             | Positive             |
| Runwaard, 2010(114)                      | 58  | Waitlist                                                    | Computer   | Provider-directed psychotherapy                                          | Positive             |

|                            |     |                                                                       | Technology                                                          |                                                                                              |                      |
|----------------------------|-----|-----------------------------------------------------------------------|---------------------------------------------------------------------|----------------------------------------------------------------------------------------------|----------------------|
| Study                      | N   | Comparator                                                            | Type                                                                | Function                                                                                     | Effectiveness Signal |
| Saul, 2006(115)            | 51  | Waitlist; Other:<br>Face-to-face<br>provider-therapy                  | Computer                                                            | Provider-directed<br>psychotherapy                                                           | Positive             |
| Schneider,<br>2005(116)    | 68  | Alternative                                                           | Computer                                                            | Multiple: Phone or<br>email contact with<br>therapist and self-<br>directed<br>psychotherapy | Positive             |
| Schroder, 2017(117)        | 180 | Waitlist                                                              | Multiple computer<br>and optional text<br>messagin by<br>smartphone | Multiple: Self-<br>directed<br>psychotherapy with<br>optional texts with<br>therapist        | Positive             |
| Schulz, 2016(118)          | 149 | Waitlist;<br>Alternative:<br>Clinician-guided<br>individual treatment | Computer                                                            | Multiple: Self-<br>directed<br>psychotherapy with<br>clinician-guided<br>discussion forum    | Positive             |
| Silfvernagel,<br>2012(119) | 57  | Waitlist                                                              | Computer                                                            | Provider-directed<br>psychotherapy                                                           | Positive             |
|                            |     |                                                                       |                                                                     |                                                                                              |                      |

| Study               | N   | Comparator                                                                                                                             | Technology                            |                                 | Effectiveness Signal |
|---------------------|-----|----------------------------------------------------------------------------------------------------------------------------------------|---------------------------------------|---------------------------------|----------------------|
|                     |     |                                                                                                                                        | Type                                  | Function                        |                      |
| Smits, 2006(120)    | 77  | Control: Sham anxiety-treating technology;<br>Alternative: Exposure with videotape feedback of audience;<br>Alternative: Exposure only | Video                                 | Auto-feedback                   | Positive             |
| Stetz, 2011(121)    | 60  | No treatment                                                                                                                           | Other: video in movie theater setting | Other: Relaxation exercises     | Positive             |
| Stolz, 2018(122)    | 150 | Waitlist                                                                                                                               | Multiple Computer or smartphone       | Self-therapy                    | Positive             |
| Swinson, 1995(123)  | 42  | Waitlist                                                                                                                               | Phone                                 | Provider-directed psychotherapy | Positive             |
| Tardif, 2019(124)   | 59  | Alternative                                                                                                                            | VR                                    | Exposure                        | Positive             |
| Tillfors, 2008(125) | 38  | Alternative: iCBT alone                                                                                                                | Computer                              | Self-therapy                    | Positive             |
| Titov, 2008(126)    | 105 | Waitlist                                                                                                                               | Computer                              | Multiple                        | Positive             |
| Titov, 2008(127)    | 88  | Waitlist                                                                                                                               | Computer                              | Multiple                        | Positive             |
| Titov, 2008(128)    | 98  | Waitlist;<br>Alternative: Self-guided online CBT                                                                                       | Computer                              | Provider-directed psychotherapy | Positive             |
| Titov, 2009(129)    | 48  | Waitlist                                                                                                                               | Computer                              | Provider-directed psychotherapy | Positive             |

| Study                       | N   | Comparator                                                                                                            | Technology                                           |                                 | Effectiveness Signal |
|-----------------------------|-----|-----------------------------------------------------------------------------------------------------------------------|------------------------------------------------------|---------------------------------|----------------------|
|                             |     |                                                                                                                       | Type                                                 | Function                        |                      |
| Titov, 2010(130)            | 113 | Alternative: iCBT + motivational enhancement strategies                                                               | Computer                                             | Self-therapy                    | Positive             |
| Titov, 2010(131)            | 86  | Waitlist                                                                                                              | Computer                                             | Multiple                        | Positive             |
| Tortella-Feliu, 2011(132)   | 60  | TAU; Alternative: Computer-aided exposure with therapist                                                              | Computer                                             | Exposure                        | Positive             |
| Tulbure, 2015(133)          | 76  | Waitlist                                                                                                              | Computer                                             | Self-therapy                    | Positive             |
| Turkel, 2017(134)           | 66  | Control: Control attention training + exposure;<br>Alternative: Attention training towards threat training + exposure | Computer                                             | Multiple: ABM + exposure        | Positive             |
| van Ballegooijen, 2013(135) | 126 | Waitlist                                                                                                              | Computer                                             | Self-therapy                    | No change            |
| Vincelli, 2003(136)         | 12  | Waitlist; Other: In-person CBT                                                                                        | Other: computer, head-mounted display and a joystick | Exposure                        | Positive             |
| Weiss, 2014(137)            | 20  | Waitlist                                                                                                              | Videoconference                                      | Provider-directed psychotherapy | Positive             |

| Study                      | N   | Comparator                                                                                                              | Technology       |                                 | Effectiveness Signal |
|----------------------------|-----|-------------------------------------------------------------------------------------------------------------------------|------------------|---------------------------------|----------------------|
|                            |     |                                                                                                                         | Type             | Function                        |                      |
| Wims, 2010(138)            | 59  | Waitlist                                                                                                                | Computer         | Provider-directed psychotherapy | Positive             |
| Wolitzky-Taylor, 2010(139) | 113 | Waitlist;<br>Alternative:<br>Expressive writing<br>and audiophotic<br>stimulation                                       | Other: audiotape | Exposure                        | Positive             |
| Yang, 2017(140)            | 76  | Control: Control<br>CBM; Alternative:<br>CBM-Interpretation;<br>Alternative: CBM-<br>Attention + CBM-<br>Interpretation | Smartphone       | Self-therapy                    | No change            |

Notes: Abbreviations: ABM: attention bias modification; CBM: cognitive-bias modification; CBT: cognitive- behavioral therapy; iCBT: Internet cognitive-behavioral therapy; TAU: treatment as usual



## References

1. Allen AR, Newby JM, Mackenzie A, et al.: Internet cognitive-behavioural treatment for panic disorder: randomised controlled trial and evidence of effectiveness in primary care. *BJPsych Open* 2:154-62, 2016
2. Amir N: Attention Disengagement Training for Social Phobia: <https://ClinicalTrials.gov/show/NCT00684320>, 2006
3. Amir N, Taboas W, Montero M: Feasibility and dissemination of a computerized home-based treatment for Generalized Anxiety Disorder: A randomized clinical trial. *Behaviour research and therapy* 120:103446, 2019
4. San Diego State University SD, California, United States: Attention Training for Generalized Anxiety Disorder: <https://ClinicalTrials.gov/show/NCT00602563>, 2007
5. Andersson G, Carlbring P, Holmstrom A, et al.: Internet-based self-help with therapist feedback and in vivo group exposure for social phobia: a randomized controlled trial. *Journal of consulting and clinical psychology* 74:677-86, 2006
6. Andersson G, Waara J, Jonsson U, et al.: Internet-based self-help versus one-session exposure in the treatment of spider phobia: a randomized controlled trial. *Cognitive behaviour therapy* 38:114-20, 2009
7. Andersson G, Paxling B, Roch-Norlund P, et al.: Internet-based psychodynamic versus cognitive behavioral guided self-help for generalized anxiety disorder: a randomized controlled trial. *Psychotherapy and psychosomatics* 81:344-55, 2012
8. Andersson G, Carlbring P, Furmark T: Therapist experience and knowledge acquisition in internet-delivered CBT for social anxiety disorder: a randomized controlled trial. *PloS one* 7:e37411, 2012
9. Andersson G, Waara J, Jonsson U, et al.: Internet-based exposure treatment versus one-session exposure treatment of snake phobia: a randomized controlled trial. *Cognitive behaviour therapy* 42:284-91, 2013
10. Andrews G, Davies M, Titov N: Effectiveness randomized controlled trial of face to face versus Internet cognitive behaviour therapy for social phobia. *The Australian and New Zealand journal of psychiatry* 45:337-40, 2011
11. Ashford MT, Olander EK, Rowe H, et al.: Feasibility and Acceptability of a Web-Based Treatment with Telephone Support for Postpartum Women With Anxiety: Randomized Controlled Trial. *JMIR Ment Health* 5:17, 2018
12. Ashford MT, Olander EK, Rowe H, et al.: Internet-based interventions for postpartum anxiety: exploring health visitors' views. *J Reprod Infant Psychol* 35:298-308, 2017
13. City University of London, Monash University: Website-Based Self-Help for Women With Anxiety After Childbirth, 2017
14. Bautista CL: Internet-based cognitive behavioral therapy with community health worker support for adults with social anxiety: ProQuest Information & Learning, 2018
15. Beard C, Amir N: A multi-session interpretation modification program: changes in interpretation and social anxiety symptoms. *Behaviour research and therapy* 46:1135-41, 2008
16. Beard C, Weisberg RB, Amir N: Combined cognitive bias modification treatment for social anxiety disorder: a pilot trial. *Depression and anxiety* 28:981-8, 2011
17. Berger T, Hohl E, Caspar F: Internet-based treatment for social phobia: a randomized controlled trial. *Journal of clinical psychology* 65:1021-35, 2009

18. Berger T, Boettcher J, Caspar F: Internet-based guided self-help for several anxiety disorders: a randomized controlled trial comparing a tailored with a standardized disorder-specific approach. *Psychotherapy (Chic)* 51:207-19, 2014
19. Berger T, Caspar F, Richardson R, et al.: Internet-based treatment of social phobia: a randomized controlled trial comparing unguided with two types of guided self-help. *Behaviour research and therapy* 49:158-69, 2011
20. Berger T, Urech A, Krieger T, et al.: Effects of a transdiagnostic unguided Internet intervention ('velibra') for anxiety disorders in primary care: results of a randomized controlled trial. *Psychological medicine*:1-14, 2016
21. Berghoff CR, Forsyth JP, Ritzert TR, et al.: Evaluation of the contribution of values clarification to a brief mindfulness meditation intervention for anxiety. *Journal of clinical psychology* 74:1387-402, 2018
22. Bergstrom J, Andersson G, Ljotsson B, et al.: Internet-versus group-administered cognitive behaviour therapy for panic disorder in a psychiatric setting: a randomised trial. *BMC psychiatry* 10:54, 2010
23. Bickel KW: An empirical test of CALM for pd: A computer-administered learning module for panic disorder: ProQuest Information & Learning, 2008
24. Boettcher J, Berger T, Renneberg B: Internet-based attention training for social anxiety: A randomized controlled trial. *Cognitive Therapy and Research* 36:522-36, 2012
25. Boettcher J, Leek L, Matson L, et al.: Internet-based attention bias modification for social anxiety: a randomised controlled comparison of training towards negative and training towards positive cues. *PloS one* 8:e71760, 2013
26. Boettcher J, Hasselrot J, Sund E, et al.: Combining attention training with internet-based cognitive-behavioural self-help for social anxiety: a randomised controlled trial. *Cognitive behaviour therapy* 43:34-48, 2014
27. Boettcher J, Astrom V, Pahlsson D, et al.: Internet-based mindfulness treatment for anxiety disorders: a randomized controlled trial. *Behavior therapy* 45:241-53, 2014
28. Boettcher J, Magnusson K, Marklund A, et al.: Adding a smartphone app to internet-based self-help for social anxiety: A randomized controlled trial. *Computers in Human Behavior* 87:98-108, 2018
29. Bornas X, Tortella-Feliu M, Llabrés J: Do all treatments work for flight phobia? Computer-assisted exposure versus a brief multicomponent nonexposure treatment. *Psychotherapy Research* 16:41-50, 2006
30. Botella C, Gallego MJ, Garcia-Palacios A, et al.: An Internet-based self-help treatment for fear of public speaking: a controlled trial. *Cyberpsychol Behav Soc Netw* 13:407-21, 2010
31. Bouchard S, Paquin B, Payeur R, et al.: Delivering cognitive-behavior therapy for panic disorder with agoraphobia in videoconference. *Telemedicine journal and e-health : the official journal of the American Telemedicine Association* 10:13-25, 2004
32. Brenes GA, Miller ME, Williamson JD, et al.: A randomized controlled trial of telephone-delivered cognitive-behavioral therapy for late-life anxiety disorders. *The American journal of geriatric psychiatry : official journal of the American Association for Geriatric Psychiatry* 20:707-16, 2012
33. Brenes GA, Danhauer SC, Lyles MF, et al.: Telephone-Delivered Cognitive Behavioral Therapy and Telephone-Delivered Nondirective Supportive Therapy for Rural Older Adults With Generalized Anxiety Disorder: A Randomized Clinical Trial. *JAMA Psychiatry* 72:1012-20, 2015

34. Brenes GA, Danhauer SC, Lyles MF, et al.: Long-Term Effects of Telephone-Delivered Psychotherapy for Late-Life GAD. *The American journal of geriatric psychiatry : official journal of the American Association for Geriatric Psychiatry* 25:1249-57, 2017
35. Butler E, Mobini S, Rapee RM, et al.: Enhanced effects of combined cognitive bias modification and computerised cognitive behaviour therapy on social anxiety. *Cogent Psychology* 2, 2015
36. Campos D, Mira A, Breton-Lopez J, et al.: The acceptability of an Internet-based exposure treatment for flying phobia with and without therapist guidance: patients' expectations, satisfaction, treatment preferences, and usability. *Neuropsychiatric disease and treatment* 14:879-92, 2018
37. Carlbring P, Ekselius L, Andersson G: Treatment of panic disorder via the Internet: a randomized trial of CBT vs. applied relaxation. *Journal of behavior therapy and experimental psychiatry* 34:129-40, 2003
38. Carlbring P, Nilsson-Ihrfelt E, Waara J, et al.: Treatment of panic disorder: live therapy vs. self-help via the Internet. *Behaviour research and therapy* 43:1321-33, 2005
39. Carlbring P, Bohman S, Brunt S, et al.: Remote treatment of panic disorder: a randomized trial of internet-based cognitive behavior therapy supplemented with telephone calls. *The American journal of psychiatry* 163:2119-25, 2006
40. Carlbring P, Gunnarsdottir M, Hedensjo L, et al.: Treatment of social phobia: randomised trial of internet-delivered cognitive-behavioural therapy with telephone support. *The British journal of psychiatry : the journal of mental science* 190:123-8, 2007
41. Carlbring P, Westling BE, Ljungstrand P, et al.: Treatment of panic disorder via the Internet: A randomized trial of a self-help program. *Behavior therapy* 32:751-64, 2001
42. Carlbring P, Maurin L, Tornngren C, et al.: Individually-tailored, Internet-based treatment for anxiety disorders: A randomized controlled trial. *Behaviour research and therapy* 49:18-24, 2011
43. Carlbring P, Apelstrand M, Sehlin H, et al.: Internet-delivered attention bias modification training in individuals with social anxiety disorder--a double blind randomized controlled trial. *BMC psychiatry* 12:66, 2012
44. Carleton RN, Teale Sapach MJ, Oriet C, et al.: Online attention modification for social anxiety disorder: replication of a randomized controlled trial. *Cognitive behaviour therapy*:1-16, 2016
45. Chen J, Mak R, Fujita S: The effect of combination of video feedback and audience feedback on social anxiety: Preliminary findings. *Behavior modification* 39:721-39, 2015
46. Chen JW, McLean JE, Kemps E: Combined Audience and Video Feedback With Cognitive Review Improves State Anxiety and Self-Perceptions During Speech Tasks in Socially Anxious Individuals. *Behavior therapy* 49:165-79, 2018
47. Choi Y-H, Vuncelli F, Riva G, et al.: Effects of Group Experiential Cognitive Therapy for the Treatment of Panic Disorder with Agoraphobia. *CyberPsychology & Behavior* 8:387-93, 2005
48. Christoforou M, Fonseca JAS, Tsakanikos E: Two Novel Cognitive Behavioral Therapy-Based Mobile Apps for Agoraphobia: Randomized Controlled Trial. *Journal of Medical Internet Research* 19:13, 2017
49. Ciuca AM, Berger T, Crisan LG, et al.: Internet-based treatment for panic disorder: A three-arm randomized controlled trial comparing guided (via real-time video sessions) with

- unguided self-help treatment and a waitlist control. PAXPD study results. *Journal of Anxiety Disorders* 56:43-55, 2018
50. Dago J, Asplund RP, Bsenko HA, et al.: Cognitive behavior therapy versus interpersonal psychotherapy for social anxiety disorder delivered via smartphone and computer: a randomized controlled trial. *J Anxiety Disord* 28:410-7, 2014
  51. Dahlin M, Andersson G, Magnusson K, et al.: Internet-delivered acceptance-based behaviour therapy for generalized anxiety disorder: A randomized controlled trial. *Behaviour research and therapy* 77:86-95, 2016
  52. Dear BF, Zou JB, Ali S, et al.: Clinical and cost-effectiveness of therapist-guided internet-delivered cognitive behavior therapy for older adults with symptoms of anxiety: a randomized controlled trial. *Behavior therapy* 46:206-17, 2015
  53. Edwards CB, Portnow S, Namaky N, et al.: Training less threatening interpretations over the internet: Impact of priming anxious imagery and using a neutral control condition. *Cognitive Therapy and Research* 42:832-43, 2018
  54. Enock PM, Hofmann SG, McNally RJ: Attention bias modification training via smartphone to reduce social anxiety: A randomized, controlled multi-session experiment. *Cognitive Therapy and Research* 38:200-16, 2014
  55. Freeman D, Haselton P, Freeman J, et al.: Automated psychological therapy using immersive virtual reality for treatment of fear of heights: a single-blind, parallel-group, randomised controlled trial. *Lancet Psychiatry* 5:625-32, 2018
  56. Furmark T, Carlbring P, Hedman E, et al.: Guided and unguided self-help for social anxiety disorder: randomised controlled trial. *The British journal of psychiatry : the journal of mental science* 195:440-7, 2009
  57. Gallego MJ, Gerardus Emmelkamp PM, van der Kooij M, et al.: The effects of a Dutch version of an Internet-based treatment program for fear of public speaking: A controlled study. *Int J Clin Health Psychol* 11:459-72, 2011
  58. Gershkovich M, Herbert JD, Forman EM, et al.: Internet-Delivered Acceptance-Based Cognitive-Behavioral Intervention for Social Anxiety Disorder With and Without Therapist Support: A Randomized Trial. *Behavior modification* 41:583-608, 2017
  59. Gorini A, Pallavicini F, Algeri D, et al.: Virtual reality in the treatment of generalized anxiety disorders. *Studies in health technology and informatics* 154:39-43, 2010
  60. Götestam KG: One session group treatment of spider phobia by direct or modelled exposure. *Cognitive behaviour therapy* 31:18-24, 2002
  61. Gross ME: The impact of text messages on anxiety and health-promoting behaviors among baccalaureate nursing students: A mixed methods approach: ProQuest Information & Learning, 2018
  62. Haddadi S, Talepasand S, Boogar IR: Attention Bias Modification for Social Anxiety Disorder: A Randomized Controlled Trial. *Iran J Psychiatry Behav Sci* 12:7, 2018
  63. Hazen RA, Vasey MW, Schmidt NB: Attentional retraining: a randomized clinical trial for pathological worry. *Journal of psychiatric research* 43:627-33, 2009
  64. Hedman E, Andersson G, Andersson E, et al.: Internet-based cognitive-behavioural therapy for severe health anxiety: randomised controlled trial. *The British journal of psychiatry : the journal of mental science* 198:230-6, 2011
  65. Hedman E, El Alaoui S, Lindefors N, et al.: Clinical effectiveness and cost-effectiveness of Internet- vs. group-based cognitive behavior therapy for social anxiety disorder: 4-year follow-up of a randomized trial. *Behaviour research and therapy* 59:20-9, 2014

66. Hedman E, Andersson G, Ljotsson B, et al.: Internet-based cognitive behavior therapy vs. cognitive behavioral group therapy for social anxiety disorder: a randomized controlled non-inferiority trial. *PloS one* 6:e18001, 2011
67. Hedman E, Axelsson E, Gorling A, et al.: Internet-delivered exposure-based cognitive-behavioural therapy and behavioural stress management for severe health anxiety: randomised controlled trial. *The British journal of psychiatry : the journal of mental science* 205:307-14, 2014
68. Hedman E, Andersson E, Ljotsson B, et al.: Cost effectiveness of internet-based cognitive behaviour therapy and behavioural stress management for severe health anxiety. *BMJ Open* 6:e009327, 2016
69. Hedman E, Hesser H, Andersson E, et al.: The mediating effect of mindful non-reactivity in exposure-based cognitive behavior therapy for severe health anxiety. *Journal of Anxiety Disorders* 50:15-22, 2017
70. Hedman E, Axelsson E, Andersson E, et al.: Exposure-based cognitive-behavioural therapy via the internet and as bibliotherapy for somatic symptom disorder and illness anxiety disorder: randomised controlled trial. *The British journal of psychiatry : the journal of mental science* 209:407-13, 2016
71. Axelsson E, Andersson E, Ljotsson B, et al.: Cost-effectiveness and long-term follow-up of three forms of minimal contact cognitive behaviour therapy for severe health anxiety: Results from a randomised controlled trial. *Behaviour research and therapy* 107:95-105, 2018
72. Ivanova E, Lindner P, Ly KH, et al.: Guided and unguided Acceptance and Commitment Therapy for social anxiety disorder and/or panic disorder provided via the Internet and a smartphone application: A randomized controlled trial. *J Anxiety Disord* 44:27-35, 2016
73. Johansson R, Hesslow T, Ljotsson B, et al.: Internet-based Affect-focused Psychodynamic Therapy for Social Anxiety Disorder: A Randomized Controlled Trial With 2-Year Follow-Up. *Psychotherapy* 54:351-60, 2017
74. Linköping University, Karolinska Institutet, Stockholm University: Internet-delivered Psychodynamic Therapy for Social Anxiety Disorder (SOFIA), 2014
75. Jones SL, Hadjistavropoulos HD, Soucy JN: A randomized controlled trial of guided internet-delivered cognitive behaviour therapy for older adults with generalized anxiety. *J Anxiety Disord* 37:1-9, 2016
76. Kählke F, Berger T, Schulz A, et al.: Efficacy of an unguided internet-based self-help intervention for social anxiety disorder in university students: A randomized controlled trial. *International Journal of Methods in Psychiatric Research*, 2019
77. Kanai Y, Sasagawa S, Chen J, et al.: The effects of video and nonnegative social feedback on distorted appraisals of bodily sensations and social anxiety. *Psychol Rep* 109:411-27, 2011
78. Kenardy JA, Dow MG, Johnston DW, et al.: A comparison of delivery methods of cognitive-behavioral therapy for panic disorder: an international multicenter trial. *Journal of consulting and clinical psychology* 71:1068-75, 2003
79. Kiropoulos LA, Klein B, Austin DW, et al.: Is internet-based CBT for panic disorder and agoraphobia as effective as face-to-face CBT? *J Anxiety Disord* 22:1273-84, 2008
80. Klein B, Richards JC: A brief internet-based treatment for panic disorder; in *Behavioural and cognitive psychotherapy*, 2001
81. Klein B, Richards JC, Austin DW: Efficacy of internet therapy for panic disorder. *Journal of behavior therapy and experimental psychiatry* 37:213-38, 2006

82. Klein B, Austin D, Pier C, et al.: Internet-based treatment for panic disorder: does frequency of therapist contact make a difference? *Cognitive behaviour therapy* 38:100-13, 2009
83. Kok RN, van Straten A, Beekman AT, et al.: Short-term effectiveness of web-based guided self-help for phobic outpatients: randomized controlled trial. *J Med Internet Res* 16:e226, 2014
84. LaFreniere LS, Newman MG: A BRIEF ECOLOGICAL MOMENTARY INTERVENTION FOR GENERALIZED ANXIETY DISORDER: A RANDOMIZED CONTROLLED TRIAL OF THE WORRY OUTCOME JOURNAL. *Depression and anxiety* 33:829-39, 2016
85. Lee HJ, Goetz AR, Turkel JE, et al.: Computerized attention retraining for individuals with elevated health anxiety. *Anxiety Stress Coping* 28:226-37, 2015
86. Lorian CN, Titov N, Grisham JR: Changes in risk-taking over the course of an internet-delivered cognitive behavioral therapy treatment for generalized anxiety disorder. *J Anxiety Disord* 26:140-9, 2012
87. Mall AK, Mehl A, Kiko S, et al.: Evaluation of a DVD-Based Self-Help Program in Highly Socially Anxious Individuals-Pilot Study. *Behavior therapy* 42:439-48, 2011
88. Maples-Keller JL, Price M, Jovanovic T, et al.: Targeting memory reconsolidation to prevent the return of fear in patients with fear of flying; in *Depression and anxiety*, 2017
89. Marks IM, Kenwright M, McDonough M, et al.: Saving clinicians' time by delegating routine aspects of therapy to a computer: a randomized controlled trial in phobia/panic disorder. *Psychological medicine* 34:9-17, 2004
90. Mathiasen K, Riper H, Ehlers LH, et al.: Internet-based CBT for social phobia and panic disorder in a specialised anxiety clinic in routine care: Results of a pilot randomised controlled trial; in *Internet Interventions Part 1*, 2016
91. Matthews A, Naran N, Kirkby KC: Symbolic online exposure for spider fear: habituation of fear, disgust and physiological arousal and predictors of symptom improvement. *Journal of behavior therapy and experimental psychiatry* 47:129-37, 2015
92. McCall HC, Richardson CG, Helgadottir FD, et al.: Evaluating a Web-Based Social Anxiety Intervention Among University Students: Randomized Controlled Trial. *Journal of Medical Internet Research* 20:12, 2018
93. Meuret AE, Simon E, Bhaskara L, et al.: Ultra-brief behavioral skills trainings for blood injection injury phobia. *Depression and anxiety* 34:1096-105, 2017
94. Minns S, Levihn-Coon A, Carl E, et al.: Immersive 3D exposure-based treatment for spider fear: A randomized controlled trial. *Journal of Anxiety Disorders* 61:37-44, 2019
95. Muller BH, Kull S, Wilhelm FH, et al.: One-session computer-based exposure treatment for spider-fearful individuals--efficacy of a minimal self-help intervention in a randomised controlled trial. *Journal of behavior therapy and experimental psychiatry* 42:179-84, 2011
96. Neubauer K, von Auer M, Murray E, et al.: Internet-delivered attention modification training as a treatment for social phobia: a randomized controlled trial. *Behaviour research and therapy* 51:87-97, 2013
97. Nilsson JE, Lundh LG: Audio Feedback with Reduced Self-focus as an Intervention for Social Anxiety: An Experimental Study. *Cognitive behaviour therapy* 45:150-62, 2016
98. Nordgren LB, Hedman E, Etienne J, et al.: Effectiveness and cost-effectiveness of individually tailored Internet-delivered cognitive behavior therapy for anxiety disorders in a primary care population: a randomized controlled trial. *Behaviour research and therapy* 59:1-11, 2014

99. Nowakowski ME, Antony MM, Koerner N: Modifying interpretation biases: Effects on symptomatology, behavior, and physiological reactivity in social anxiety. *Journal of behavior therapy and experimental psychiatry* 49:44-52, 2015
100. Orbach G, Lindsay S, Grey S: A randomised placebo-controlled trial of a self-help Internet-based intervention for test anxiety. *Behaviour research and therapy* 45:483-96, 2007
101. Oromendia P, Orrego J, Bonillo A, et al.: Internet-based self-help treatment for panic disorder: a randomized controlled trial comparing mandatory versus optional complementary psychological support. *Cognitive behaviour therapy* 45:270-86, 2016
102. Universitat Autònoma de Barcelona: Internet-based Self-help Treatment for Panic Disorder: Two Ways of Complementary Psychological Support, 2014
103. Orr EM, Moscovitch DA: Learning to re-appraise the self during video feedback for social anxiety: Does depth of processing matter? *Behaviour research and therapy* 48:728-37, 2010
104. Orr EMJ, Moscovitch DA: Physical appearance anxiety impedes the therapeutic effects of video Feedback in high socially anxious individuals. *Behavioural and cognitive psychotherapy* 42:92-104, 2014
105. Pallavicini F, Algeri D, Repetto C, et al.: Biofeedback, virtual reality and mobile phones in the treatment of generalized anxiety disorder (GAD): A phase-2 controlled clinical trial. *Journal of Cybertherapy and Rehabilitation* 2:315-27, 2009
106. Paxling B, Almlöv J, Dahlin M, et al.: Guided internet-delivered cognitive behavior therapy for generalized anxiety disorder: a randomized controlled trial. *Cognitive behaviour therapy* 40:159-73, 2011
107. Pham Q, Khatib Y, Stansfeld S, et al.: Feasibility and Efficacy of an mHealth Game for Managing Anxiety: "Flowy" Randomized Controlled Pilot Trial and Design Evaluation. *Games Health J* 5:50-67, 2016
108. Richards D, Timulak L, Rashleigh C, et al.: Effectiveness of an internet-delivered intervention for generalized anxiety disorder in routine care: a randomised controlled trial in a student population; in *Internet interventions*, 2016
109. Robillard G, Bouchard S, Dumoulin S, et al.: Using virtual humans to alleviate social anxiety: Preliminary report from a comparative outcome study. *Annual Review of CyberTherapy and Telemedicine* 8:46-8, 2010
110. Robinson E, Titov N, Andrews G, et al.: Internet treatment for generalized anxiety disorder: a randomized controlled trial comparing clinician vs. technician assistance. *PloS one* 5:e10942, 2010
111. Rollman BL, Belnap BH, Mazumdar S, et al.: Telephone-Delivered Stepped Collaborative Care for Treating Anxiety in Primary Care: A Randomized Controlled Trial. *Journal of general internal medicine* 32:245-55, 2017
112. University of Pittsburgh P, Pennsylvania, United States: Telephone-Based Care Management Program for Individuals With Anxiety Disorders: <https://ClinicalTrials.gov/show/NCT00158327>, 2004
113. Rosmarin DH, Pargament KI, Pirutinsky S, et al.: A randomized controlled evaluation of a spiritually integrated treatment for subclinical anxiety in the Jewish community, delivered via the Internet. *J Anxiety Disord* 24:799-808, 2010
114. Ruwaard J, Broeksteeg J, Schrieken B, et al.: Web-based therapist-assisted cognitive behavioral treatment of panic symptoms: a randomized controlled trial with a three-year follow-up. *J Anxiety Disord* 24:387-96, 2010

115. Saul JE: A comparison of internet-based versus face-to-face cognitive behavioral therapy for snake phobia: ProQuest Information & Learning, 2007
116. Schneider AJ, Mataix-Cols D, Marks IM, et al.: Internet-guided self-help with or without exposure therapy for phobic and panic disorders - A randomised controlled trial. *Psychotherapy and psychosomatics* 74:154-64, 2005
117. Schroder J, Jelinek L, Moritz S: A randomized controlled trial of a transdiagnostic Internet intervention for individuals with panic and phobias - One size fits all. *Journal of behavior therapy and experimental psychiatry* 54:17-24, 2017
118. Schulz A, Stolz T, Vincent A, et al.: A sorrow shared is a sorrow halved? A three-arm randomized controlled trial comparing internet-based clinician-guided individual versus group treatment for social anxiety disorder. *Behaviour research and therapy* 84:14-26, 2016
119. Silfvernagel K, Carlbring P, Kabo J, et al.: Individually tailored internet-based treatment for young adults and adults with panic attacks: randomized controlled trial. *J Med Internet Res* 14:e65, 2012
120. Smits JAJ, Powers MB, Buxkamper R, et al.: The efficacy of videotape feedback for enhancing the effects of exposure-based treatment for social anxiety disorder: A controlled investigation. *Behaviour research and therapy* 44:1773-85, 2006
121. Stetz MC, Kaloi-Chen JY, Turner DD, et al.: The effectiveness of technology-enhanced relaxation techniques for military medical warriors. *Mil Med* 176:1065-70, 2011
122. Stolz T, Schulz A, Krieger T, et al.: A Mobile App for Social Anxiety Disorder: A Three-Arm Randomized Controlled Trial Comparing Mobile and PC-Based Guided Self-Help Interventions. *Journal of consulting and clinical psychology* 86:493-504, 2018
123. Swinson RP, Fergus KD, Cox BJ, et al.: Efficacy of telephone-administered behavioral therapy for panic disorder with agoraphobia. *Behaviour research and therapy* 33:465-9, 1995
124. Tardif N, Therrien C-É, Bouchard S: Re-examining psychological mechanisms underlying virtual reality-based exposure for spider phobia. *Cyberpsychology, Behavior, and Social Networking* 22:39-45, 2019
125. Tillfors M, Carlbring P, Furmark T, et al.: Treating university students with social phobia and public speaking fears: Internet delivered self-help with or without live group exposure sessions. *Depression and anxiety* 25:708-17, 2008
126. Titov N, Andrews G, Schwencke G, et al.: Shyness 1: distance treatment of social phobia over the Internet. *The Australian and New Zealand journal of psychiatry* 42:585-94, 2008
127. Titov N, Andrews G, Schwencke G: Shyness 2: treating social phobia online: replication and extension. *The Australian and New Zealand journal of psychiatry* 42:595-605, 2008
128. Titov N, Andrews G, Choi I, et al.: Shyness 3: randomized controlled trial of guided versus unguided Internet-based CBT for social phobia. *The Australian and New Zealand journal of psychiatry* 42:1030-40, 2008
129. Titov N, Andrews G, Robinson E, et al.: Clinician-assisted Internet-based treatment is effective for generalized anxiety disorder: Randomized controlled trial. *Australian and New Zealand Journal of Psychiatry* 43:905-12, 2009
130. Titov N, Andrews G, Schwencke G, et al.: Randomized controlled trial of Internet cognitive behavioural treatment for social phobia with and without motivational enhancement strategies. *The Australian and New Zealand journal of psychiatry* 44:938-45, 2010
131. Titov N, Andrews G, Johnston L, et al.: Transdiagnostic Internet treatment for anxiety disorders: A randomized controlled trial. *Behaviour research and therapy* 48:890-9, 2010



132. Tortella-Feliu M, Botella C, Llabres J, et al.: Virtual reality versus computer-aided exposure treatments for fear of flying. *Behavior modification* 35:3-30, 2011
133. Tulbure BT, Szentagotai A, David O, et al.: Internet-delivered cognitive-behavioral therapy for social anxiety disorder in Romania: a randomized controlled trial. *PloS one* 10:e0123997, 2015
134. Turkel JE: Combining attention bias pretraining with exposure therapy for individuals with a fear of spiders: ProQuest Information & Learning, 2018
135. van Ballegooijen W, Riper H, Klein B, et al.: An Internet-based guided self-help intervention for panic symptoms: randomized controlled trial. *J Med Internet Res* 15:e154, 2013
136. Vincelli F, Anolli L, Bouchard S, et al.: Experiential Cognitive Therapy in the Treatment of Panic Disorders with Agoraphobia: A Controlled Study. *CyberPsychology & Behavior* 6:321-8, 2003
137. Weiss BJ: Feasibility of telehealth cognitive-behavioral therapy for social anxiety disorder: ProQuest Information & Learning, 2014
138. Wims E, Titov N, Andrews G, et al.: Clinician-assisted Internet-based treatment is effective for panic: A randomized controlled trial. *The Australian and New Zealand journal of psychiatry* 44:599-607, 2010
139. Wolitzky-Taylor KB, Telch MJ: Efficacy of self-administered treatments for pathological academic worry: A randomized controlled trial. *Behaviour research and therapy* 48:840-50, 2010
140. Yang R, Cui L, Li F, et al.: Effects of cognitive bias modification training via smartphones. *Frontiers in Psychology* 8, 2017
